# Supplementary material for: Ecological Momentary Assessment of Adolescent Problems, Coping Efficacy, and Mood States Using a Mobile Phone App: An Exploratory Study
Source: PubMed Central journal article supplement (PMC5155083; doi:10.2196/mental.6361), 2016-11-29

Multimedia Appendix 1: Number of participants who completed EMA ratings on each day of the intervention period.

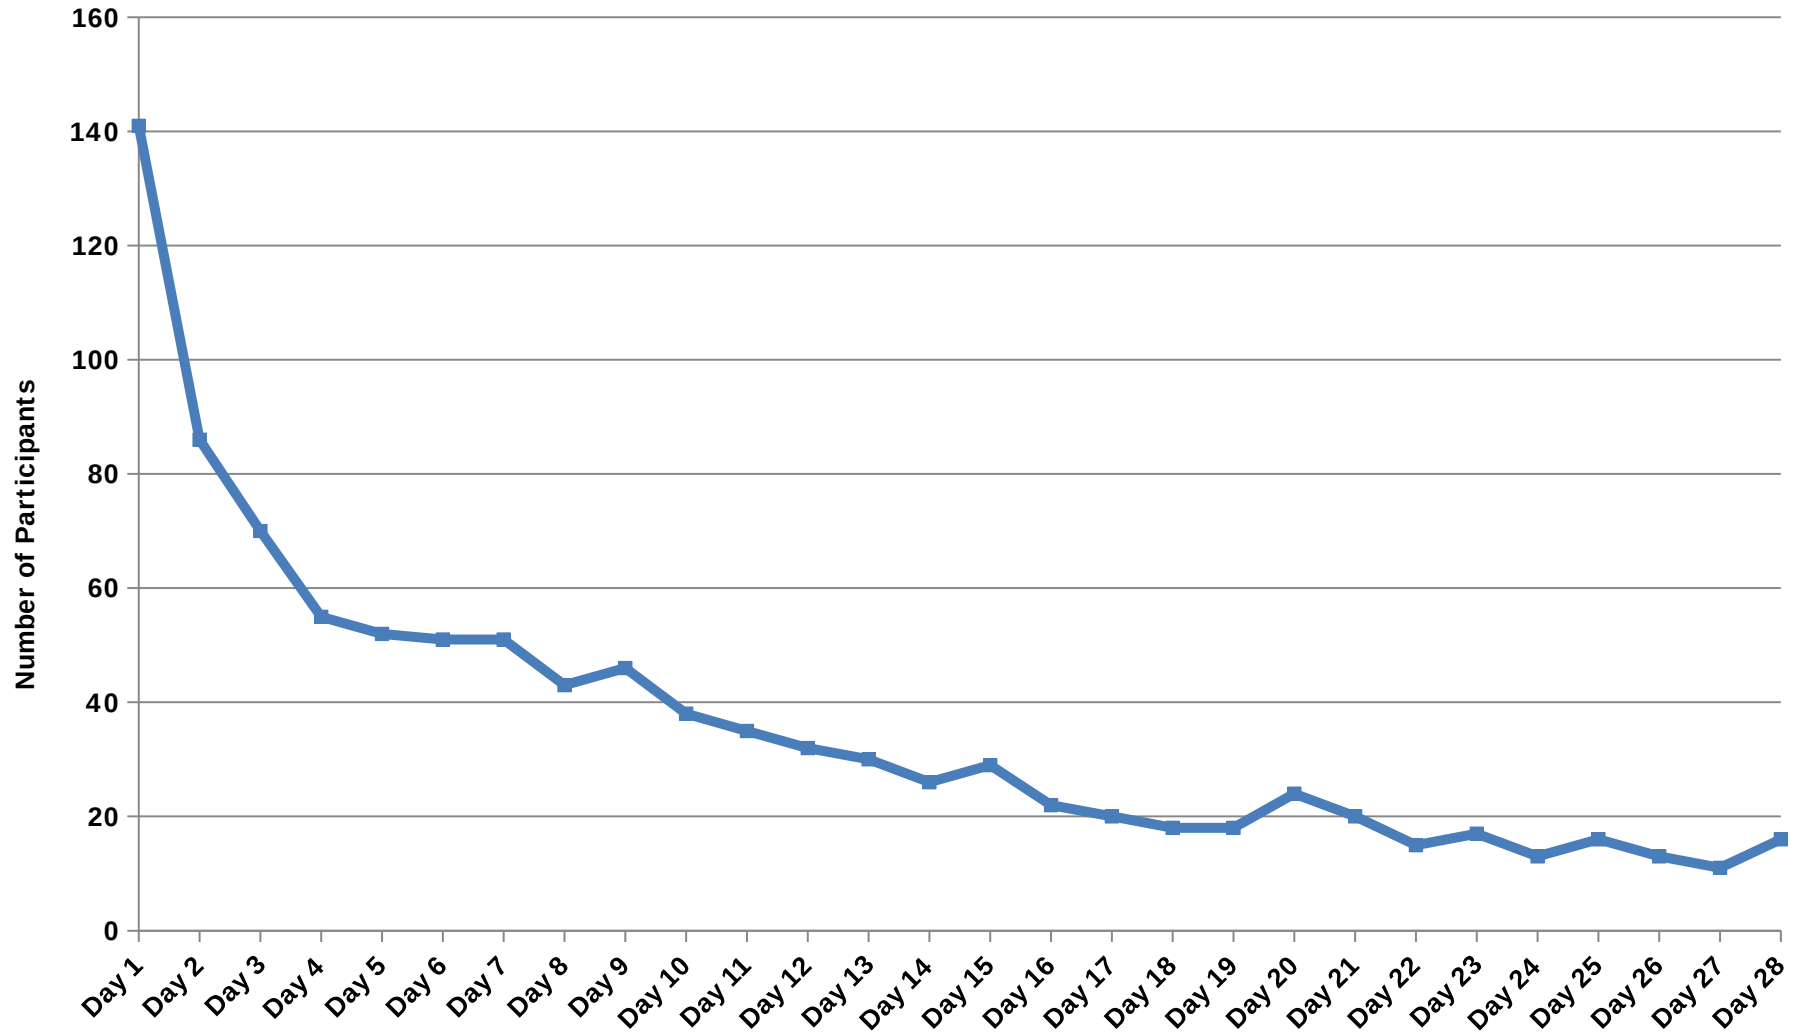

Supplement: mental_v3i4e51_app1.pdf [file mental_v3i4e51_app1.pdf]
